# Supplementary material for: Lead (Pb) Isotope Baselines for Studies of Ancient Human Migration and Trade in the Maya Region
Source: PLOS journal article supplement (doi:10.1371/journal.pone.0164871), 2016-11-02

# Supporting Information

Generated by R (version 3.1.1)

Metamorphic Province (non-Motagua Valley) and Volcanic Highlands excluded due to each having only 4 and 5 data points, respectively.

## Key:

centroid = average of all points in a group

SS = Sum of Squares (between\_SS/total\_SS = 100% is perfect fit)

## Northern Lowlands:

$^{207}\text{Pb}/^{206}\text{Pb}$ :

K-Means Report:

Centroids = 2

Cluster means:

|   | $^{206}\text{Pb}/^{204}\text{Pb}$ | $^{207}\text{Pb}/^{204}\text{Pb}$ |
|---|-----------------------------------|-----------------------------------|
| 1 | 22.39229                          | 15.79460                          |
| 2 | 19.09218                          | 15.66569                          |

Within cluster sum of squares by cluster:

1.346978, 1.049611

(between\_SS/total\_SS = 89.4%)

$^{208}\text{Pb}/^{206}\text{Pb}$ :

K-Means Report:

Centroids = 2

Cluster means:

|   | $^{206}\text{Pb}/^{204}\text{Pb}$ | $^{208}\text{Pb}/^{204}\text{Pb}$ |
|---|-----------------------------------|-----------------------------------|
| 1 | 22.39229                          | 38.66207                          |
| 2 | 19.09218                          | 38.78843                          |

Within cluster sum of squares by cluster:

1.358936, 1.280167

(between\_SS/total\_SS = 88.4 %)

## Southern Lowlands:

$^{207}\text{Pb}/^{206}\text{Pb}$ :

K-Means Report:

Centroids = 3

Cluster means:

|  | $^{206}\text{Pb}/^{204}\text{Pb}$ | $^{207}\text{Pb}/^{204}\text{Pb}$ |
|--|-----------------------------------|-----------------------------------|
|--|-----------------------------------|-----------------------------------|

|   |          |          |
|---|----------|----------|
| 1 | 45.62330 | 16.94360 |
| 2 | 28.24225 | 16.00115 |
| 3 | 20.44843 | 15.69600 |

Within cluster sum of squares by cluster:  
 0.00000, 14.90283, 17.94353  
 (between\_SS /total\_SS = 95.2%)

$^{208}\text{Pb}/^{206}\text{Pb}$ :

K-Means Report:

Centroids = 3

Cluster means:

|   | $^{206}\text{Pb}/^{204}\text{Pb}$ | $^{208}\text{Pb}/^{204}\text{Pb}$ |
|---|-----------------------------------|-----------------------------------|
| 1 | 20.44843                          | 38.65338                          |
| 2 | 28.24225                          | 38.65780                          |
| 3 | 45.62330                          | 38.85490                          |

Within cluster sum of squares by cluster:  
 18.16371, 14.85656, 0.00000  
 (between\_SS /total\_SS = 95.2%)

## Motagua Valley:

$^{207}\text{Pb}/^{206}\text{Pb}$ :

K-Means Report:

Centroids = 2

Cluster means:

|   | $^{206}\text{Pb}/^{204}\text{Pb}$ | $^{207}\text{Pb}/^{204}\text{Pb}$ |
|---|-----------------------------------|-----------------------------------|
| 1 | 20.46376                          | 15.76137                          |
| 2 | 18.70488                          | 15.61996                          |

Within cluster sum of squares by cluster:  
 0.0000000, 0.2554385  
 (between\_SS/total\_SS = 91.4 %)

$^{208}\text{Pb}/^{206}\text{Pb}$ :

K-Means Report:

Centroids = 3

Cluster means:

|   | $^{206}\text{Pb}/^{204}\text{Pb}$ | $^{208}\text{Pb}/^{204}\text{Pb}$ |
|---|-----------------------------------|-----------------------------------|
| 1 | 18.47330                          | 37.99805                          |
| 2 | 18.79751                          | 38.62367                          |
| 3 | 20.46376                          | 39.37748                          |

Within cluster sum of squares by cluster:  
 0.13116280, 0.09497238, 0.00000000  
 (between\_SS/total\_SS = 94.9 %)

**A** $^{207}\text{Pb}/^{204}\text{Pb}$ 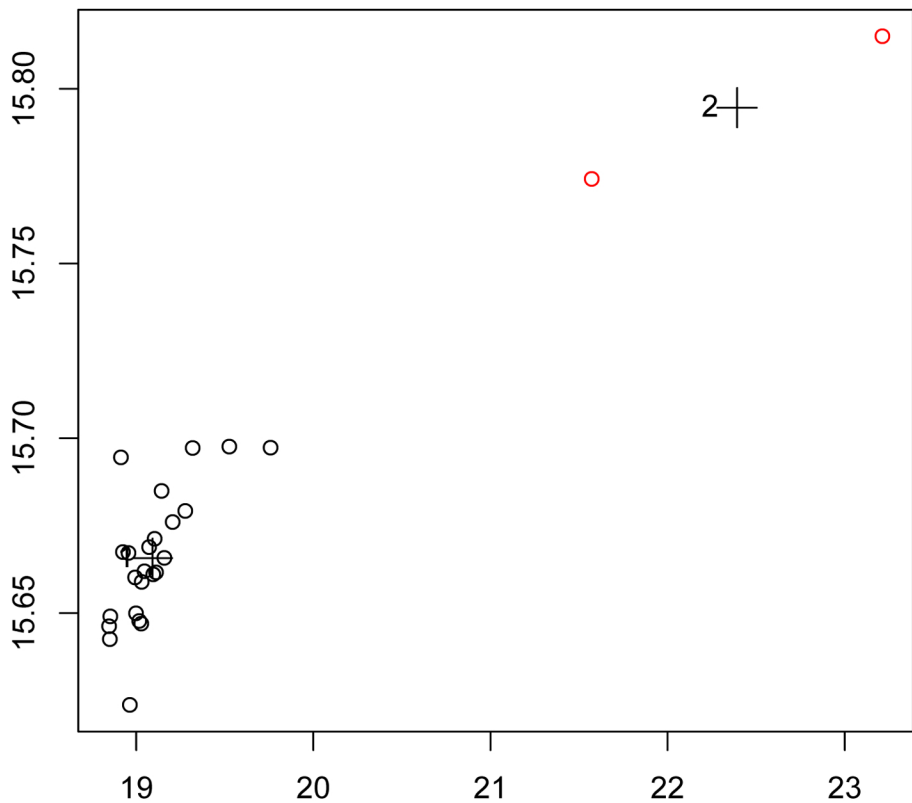 $^{206}\text{Pb}/^{204}\text{Pb}$

**B**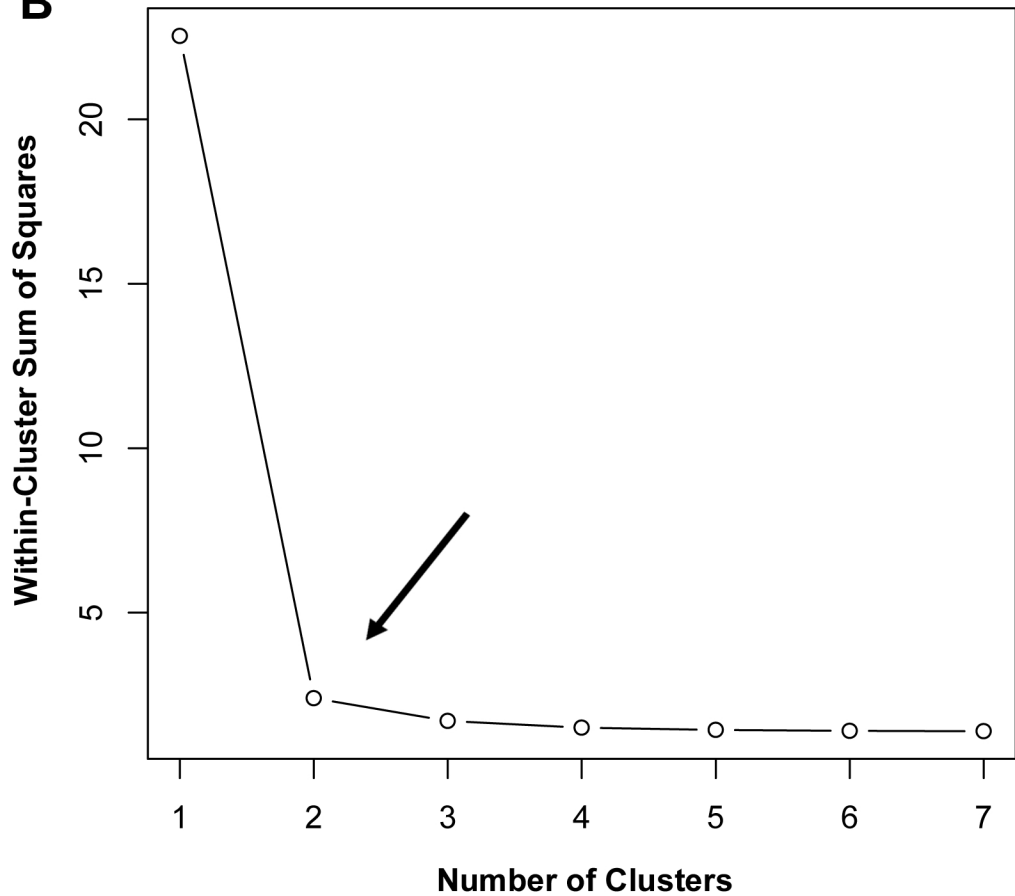

**C** $^{208}\text{Pb}/^{204}\text{Pb}$ 38.6  
38.7  
38.8  
38.9

19

20

21

22

23

 $^{206}\text{Pb}/^{204}\text{Pb}$ 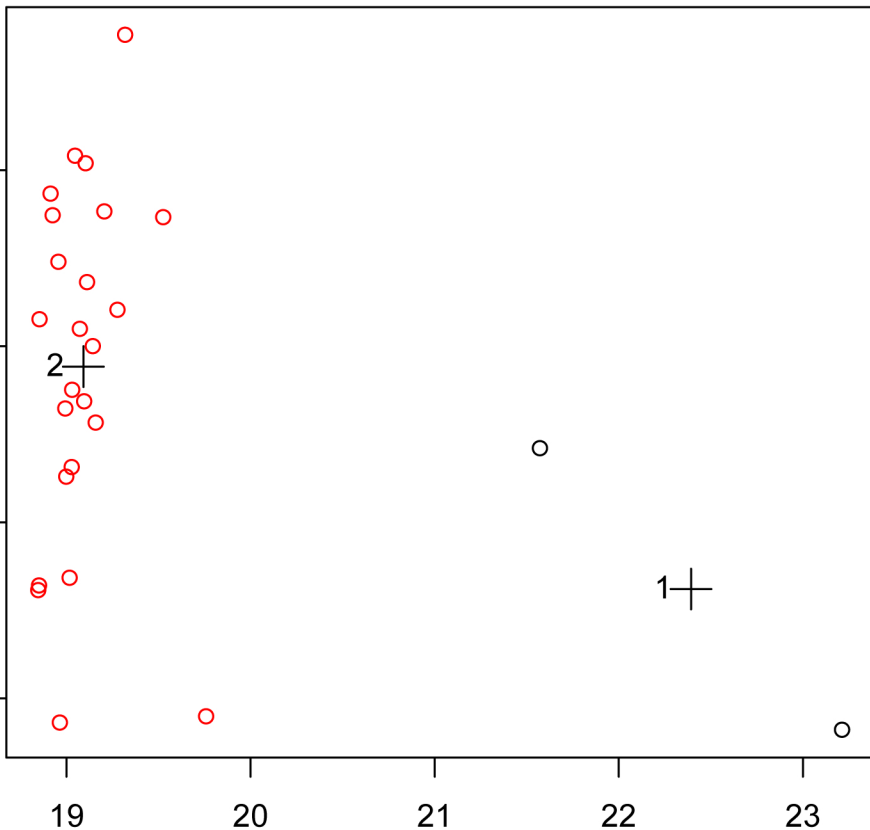

**D****Within-Cluster Sum of Squares**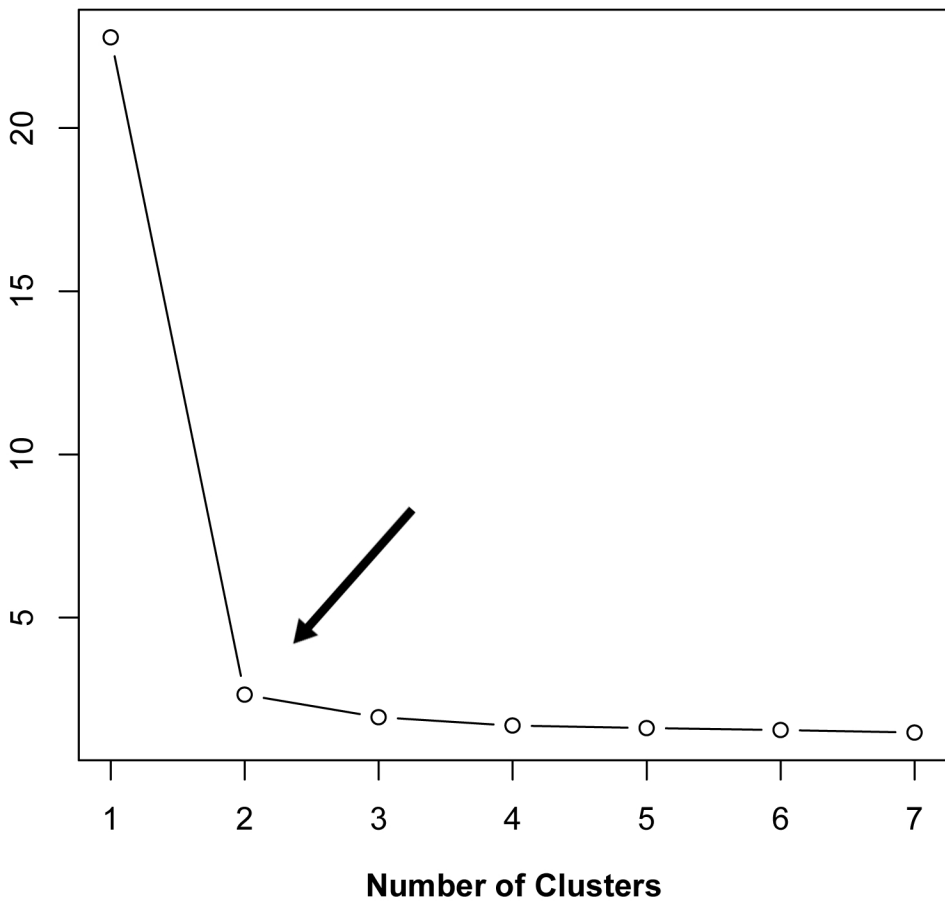

**m**

**$^{207}\text{Pb}/^{204}\text{Pb}$**

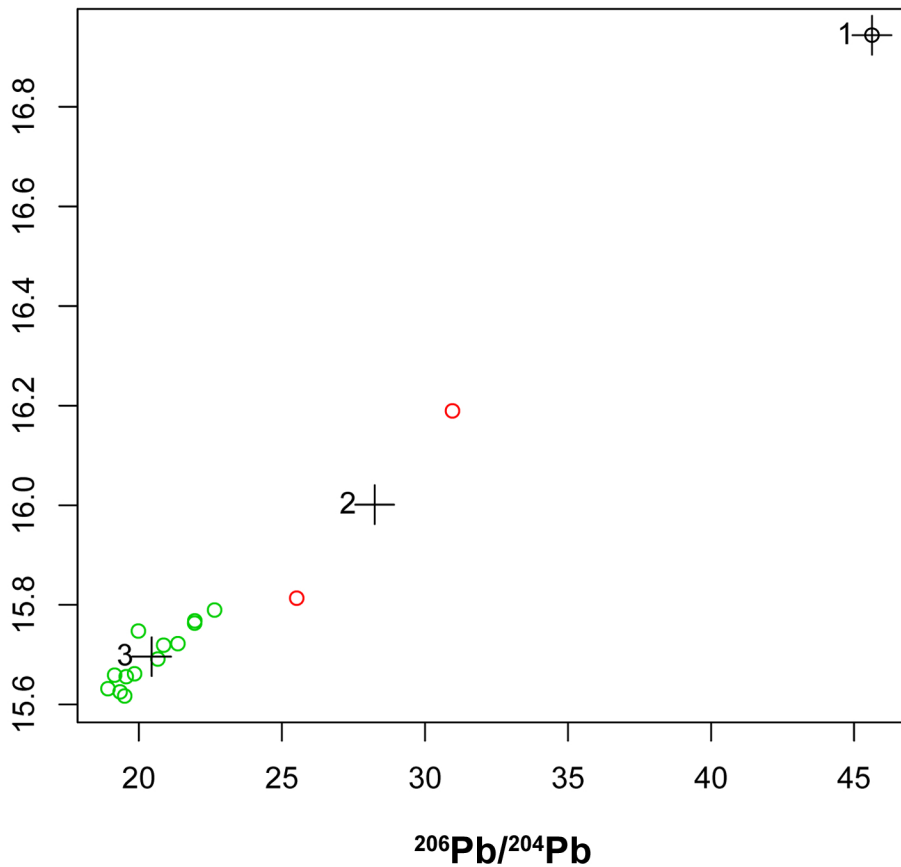

$\pi$ 

Within-Cluster Sum of Squares

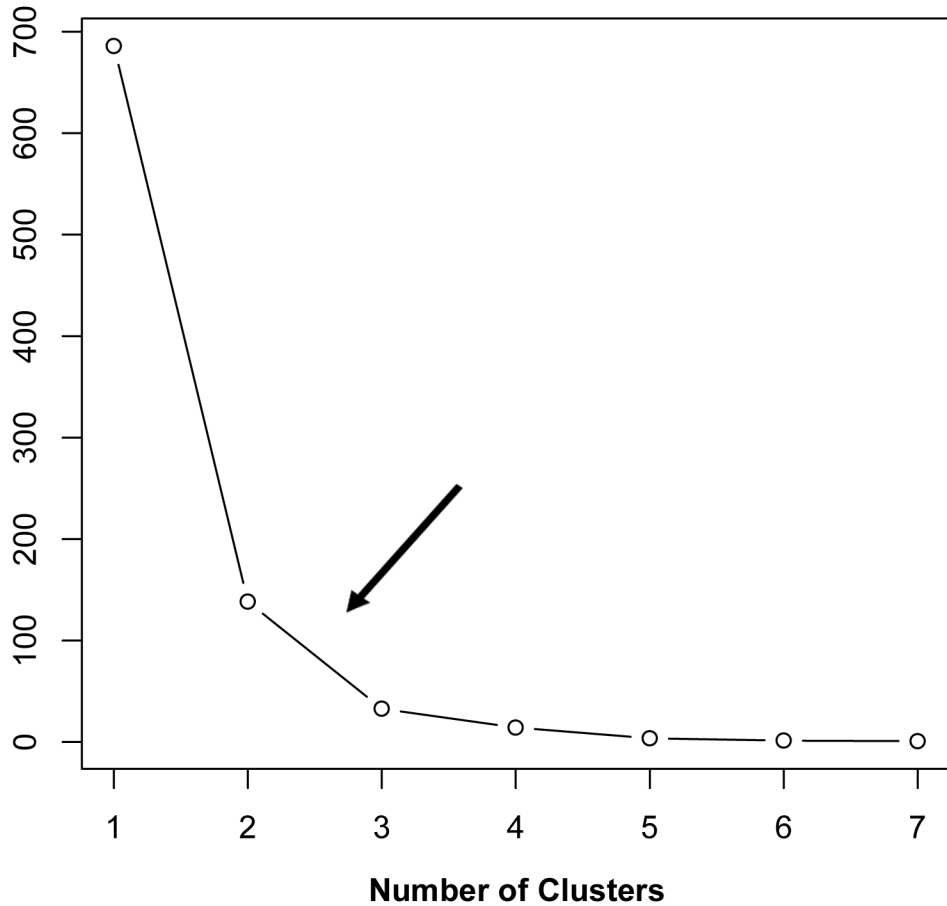



**G** $^{208}\text{Pb}/^{204}\text{Pb}$ 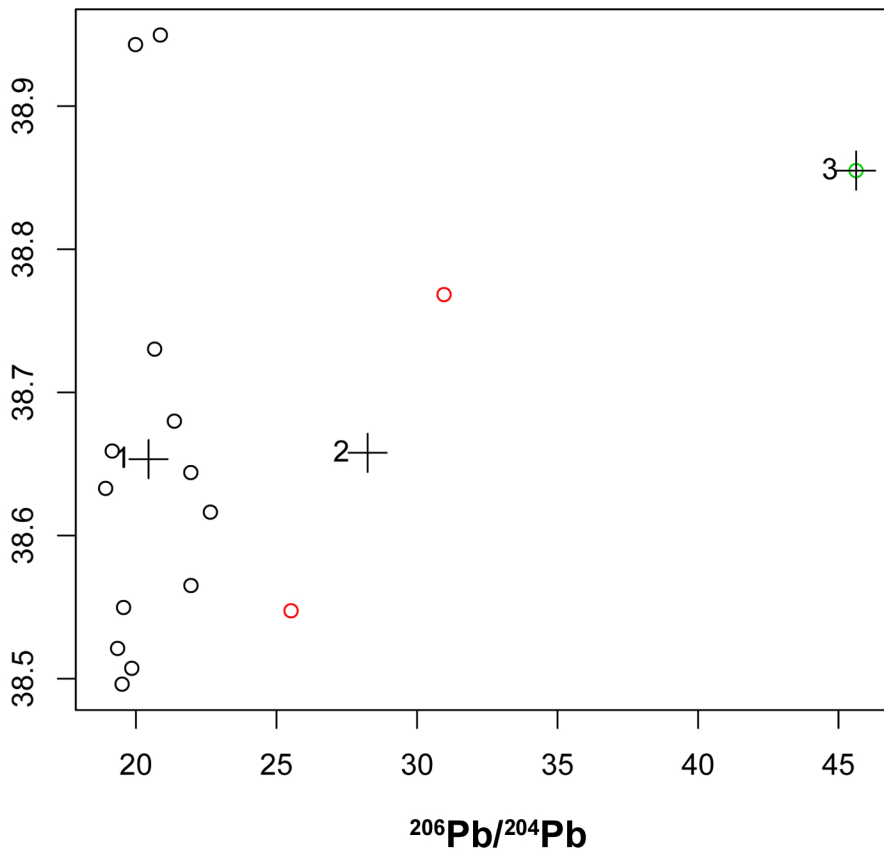

**H****Within-Cluster Sum of Squares**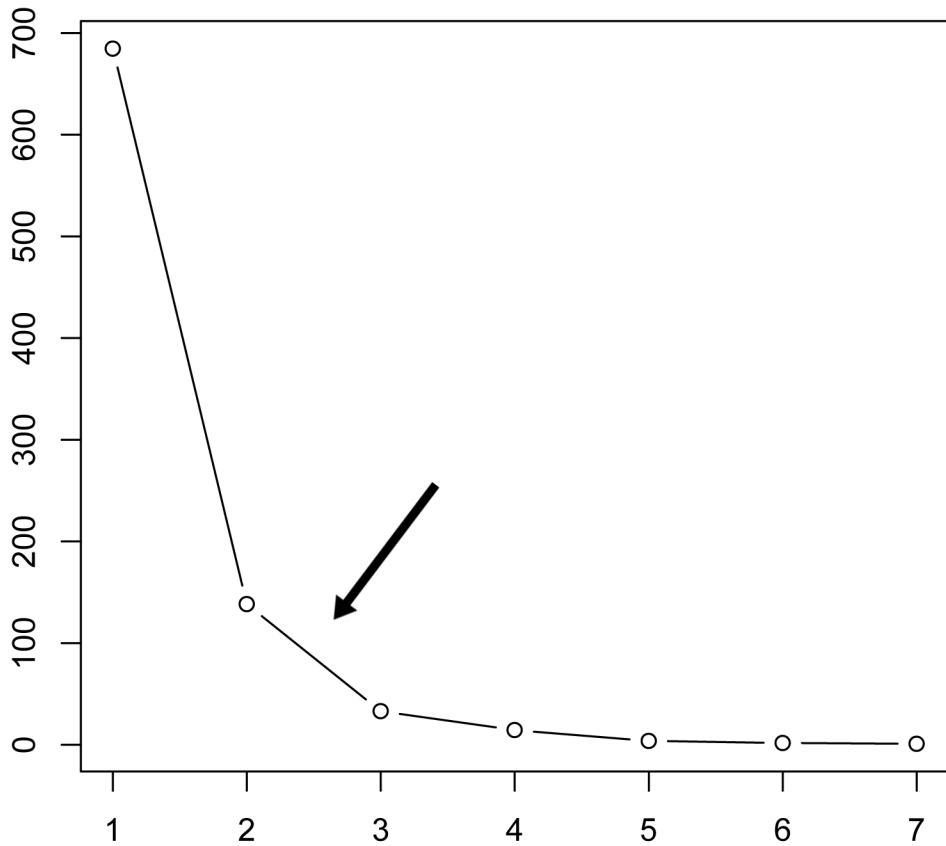**Number of Clusters**

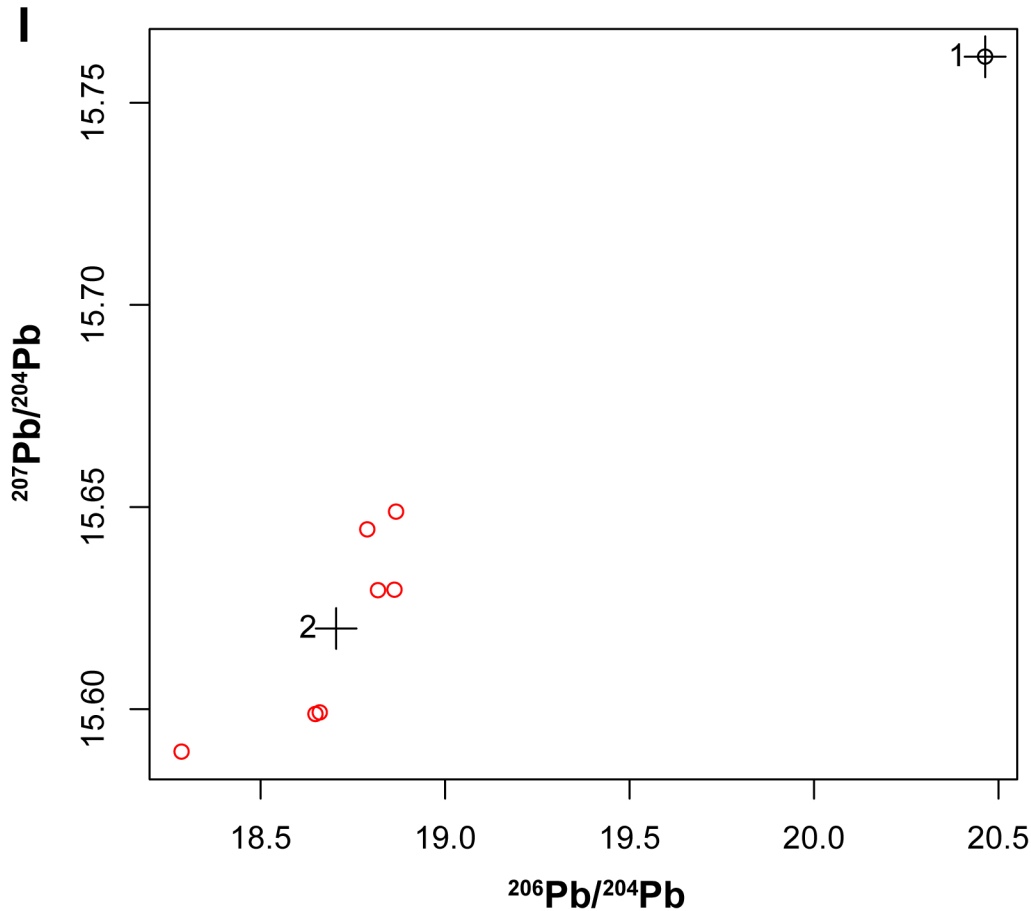

Within-Cluster Sum of Squares

U

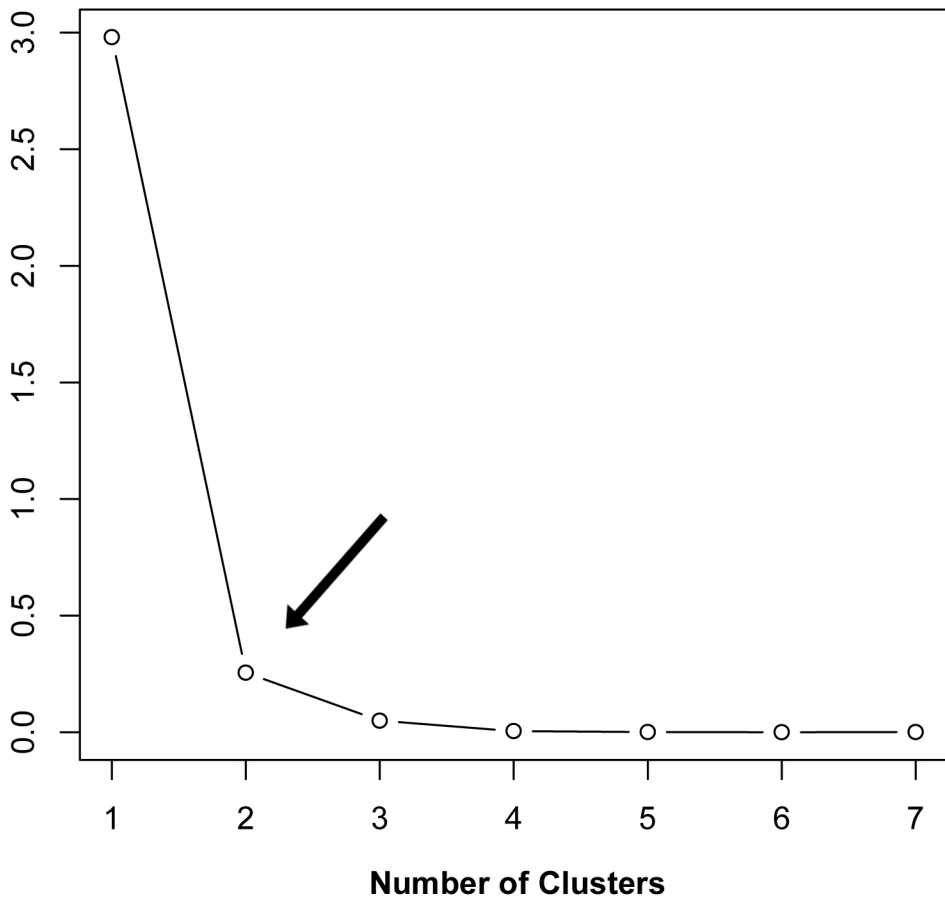

**K** **$^{208}\text{Pb}/^{204}\text{Pb}$** 39.0  
38.5  
38.0

18.5

19.0

19.5

20.0

20.5

 **$^{206}\text{Pb}/^{204}\text{Pb}$** 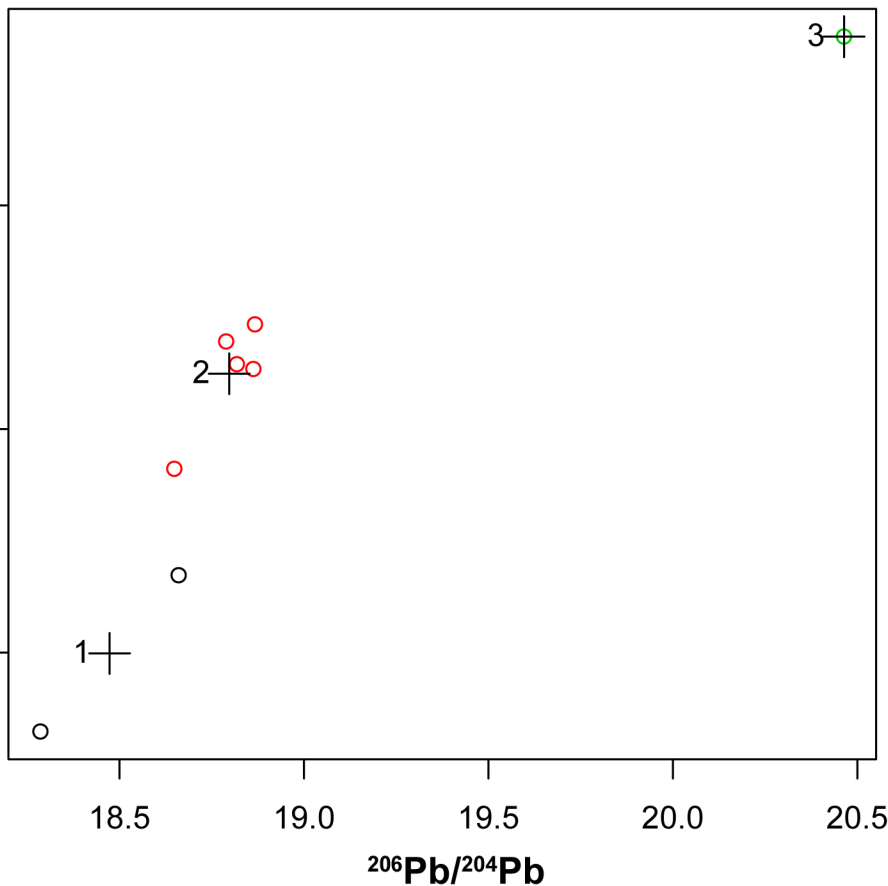

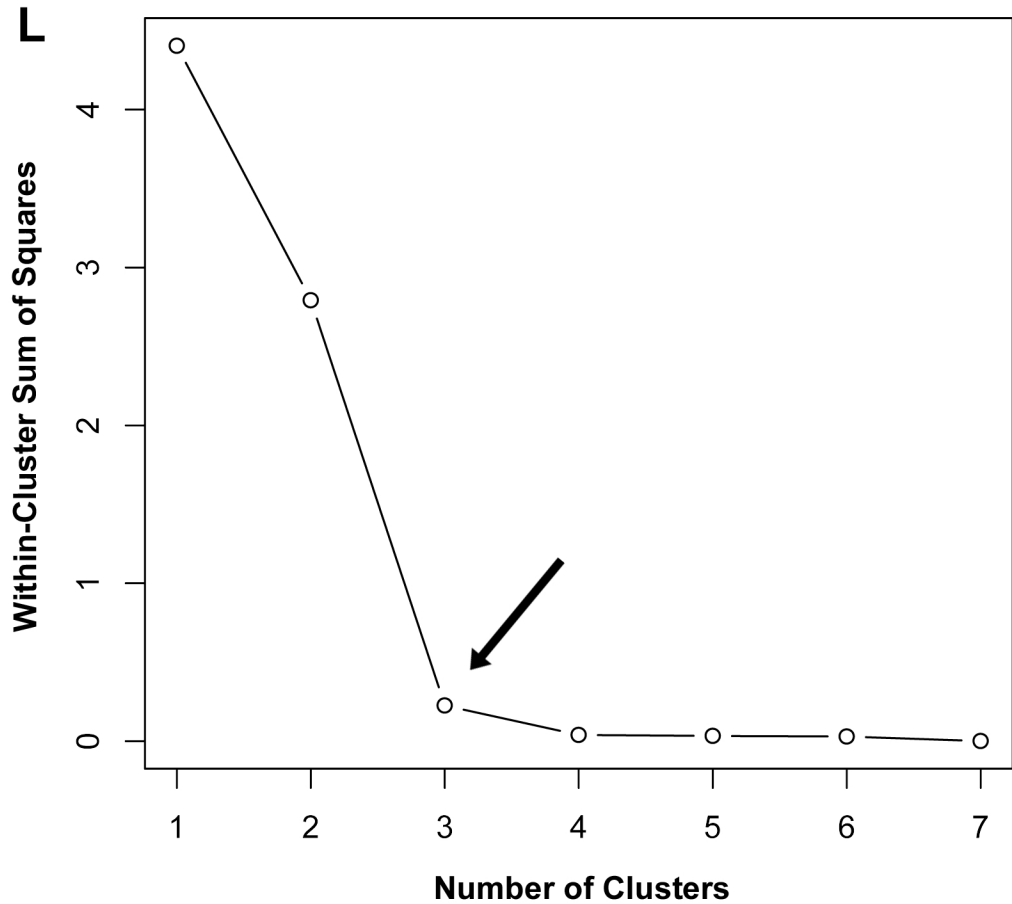

Supplement: S1 (10.1371/journal.pone.0164871.s001) [file journal.pone.0164871.s001]
